# Supplementary material for: On the instability of iodides of heavy main group atoms in their higher oxidation state
Source: Royal Society of Chemistry journal article supplement (doi:10.1039/d3cp00014a), 2023-01-01

# Supporting Information

## On the Instability of Iodides of Heavy Main Group Atoms in their Higher Oxidation State

Priyakumari Chakkingal Parambil<sup>a,\*</sup> and Sathya S R R Perumal<sup>b</sup>

<sup>a</sup>Department of Chemistry, Indian Institute of Technology, Palakkad 678 557 India

<sup>b</sup>Solid State and Structural Chemistry Unit, Indian Institute of Science, Bangalore 560 012 India

- Coordinates and Energies-----S2
- Scheme S1-----S4

Coordinates and energies (sum of electronic and zero point energies) of the structures calculated at the M06-2X/Def2-TZVPD level of theory.

|                                                              |              |              |                                                             |              |              |              |
|--------------------------------------------------------------|--------------|--------------|-------------------------------------------------------------|--------------|--------------|--------------|
| TeI <sub>6</sub>                                             |              |              | I                                                           | 4.911761000  | 2.234844000  | 0.206568000  |
| E+ZPE: -2053.781373 a. u.                                    |              |              | I                                                           | -4.911761000 | -2.234844000 | -0.206568000 |
| Te                                                           | 0.000000000  | 0.000000000  | Transition state for the decomposition of TeBr <sub>6</sub> |              |              |              |
| I                                                            | 0.000000000  | 0.000000000  | E+ZPE: -31426.278874 a. u.                                  |              |              |              |
| I                                                            | 0.000000000  | 2.786435000  | Te                                                          | -3.055727000 | -0.090821000 | -0.034639000 |
| I                                                            | 2.786435000  | 0.000000000  | Br                                                          | -3.970704000 | -0.453509000 | 2.328090000  |
| I                                                            | 0.000000000  | 0.000000000  | Br                                                          | -1.718093000 | 2.138011000  | 0.963789000  |
| I                                                            | 0.000000000  | -2.786435000 | Br                                                          | -4.919617000 | 1.535879000  | -0.451024000 |
| I                                                            | 0.000000000  | 0.000000000  | Br                                                          | -4.372881000 | -2.014602000 | -0.971310000 |
| I                                                            | 0.000000000  | -2.786435000 | Br                                                          | -2.072559000 | 0.512467000  | -2.319142000 |
| I                                                            | -2.786435000 | 0.000000000  | Br                                                          | -0.882139000 | -1.438155000 | 0.501065000  |
| TeBr <sub>6</sub>                                            |              |              | Te                                                          | 3.055733000  | 0.090824000  | -0.034616000 |
| E+ZPE: -15713.147769 a. u.                                   |              |              | Br                                                          | 3.971035000  | 0.452882000  | 2.328092000  |
| Te                                                           | 0.000000000  | 0.000000000  | Br                                                          | 4.372770000  | 2.014840000  | -0.970968000 |
| Br                                                           | 0.000000000  | 2.531546000  | Br                                                          | 0.882207000  | 1.438033000  | 0.501676000  |
| Br                                                           | 0.000000000  | 0.000000000  | Br                                                          | 1.718130000  | -2.138191000 | 0.963426000  |
| Br                                                           | -2.531546000 | 0.000000000  | Br                                                          | 2.072280000  | -0.511883000 | -2.319140000 |
| Br                                                           | 0.000000000  | -2.531546000 | Br                                                          | 4.919563000  | -1.535777000 | -0.451662000 |
| Br                                                           | 0.000000000  | 0.000000000  | Transition state for the decomposition of TeCl <sub>6</sub> |              |              |              |
| Br                                                           | 2.531546000  | 0.000000000  | E+ZPE: -6058.254196 a. u.                                   |              |              |              |
| SbI <sub>5</sub>                                             |              |              | Te                                                          | 2.973826000  | 0.094967000  | 0.008470000  |
| E+ZPE: -1728.461036 a. u.                                    |              |              | Te                                                          | -2.973827000 | -0.094967000 | 0.008476000  |
| Sb                                                           | 0.000000000  | 0.000000000  | Cl                                                          | 4.605599000  | -1.538098000 | 0.074541000  |
| I                                                            | 0.000000000  | 2.707087000  | Cl                                                          | 2.771836000  | -0.121238000 | 2.368600000  |
| I                                                            | -2.344406000 | -1.353543000 | Cl                                                          | 4.466651000  | 1.856072000  | 0.187314000  |
| I                                                            | 0.000000000  | 0.000000000  | Cl                                                          | 3.138945000  | 0.048398000  | -2.364494000 |
| I                                                            | 2.344406000  | -1.353543000 | Cl                                                          | 1.385220000  | -2.131403000 | -0.189155000 |
| I                                                            | 0.000000000  | 0.000000000  | Cl                                                          | 0.802485000  | 1.328573000  | -0.102703000 |
| Transition state for the decomposition of SbI <sub>5</sub>   |              |              | Cl                                                          | -1.385224000 | 2.131407000  | -0.189235000 |
| E+ZPE: -3456.926242 a. u.                                    |              |              | Cl                                                          | -0.802472000 | -1.328562000 | -0.102595000 |
| I                                                            | 1.246032000  | 1.425429000  | Cl                                                          | -4.466646000 | -1.856069000 | 0.187381000  |
| I                                                            | 4.590897000  | -0.995413000 | Cl                                                          | -2.771902000 | 0.121368000  | 2.368599000  |
| I                                                            | 1.854003000  | -2.444469000 | Cl                                                          | -3.138884000 | -0.048542000 | -2.364497000 |
| I                                                            | -1.854006000 | 2.444447000  | Cl                                                          | -4.605606000 | 1.538094000  | 0.074408000  |
| I                                                            | -1.246020000 | -1.425427000 | TeCl <sub>6</sub>                                           |              |              |              |
| I                                                            | -4.763375000 | 0.933153000  | E+ZPE: -3029.161126 a. u.                                   |              |              |              |
| I                                                            | 4.763460000  | -0.933792000 | Te                                                          | 0.000000000  | 0.000000000  | 0.000000000  |
| I                                                            | -4.591018000 | 0.996059000  | Cl                                                          | 0.000000000  | 0.000000000  | 2.333286000  |
| I                                                            | -5.211303000 | -2.249221000 | Cl                                                          | 0.000000000  | 2.333286000  | 0.000000000  |
| I                                                            | 5.211327000  | 2.249230000  | Cl                                                          | 2.333286000  | 0.000000000  | 0.000000000  |
| Sb                                                           | -3.577194000 | -0.015218000 | Cl                                                          | 0.000000000  | 0.000000000  | -2.333286000 |
| Sb                                                           | 3.577196000  | 0.015224000  | Cl                                                          | 0.000000000  | -2.333286000 | 0.000000000  |
| PbI <sub>4</sub>                                             |              |              | Cl                                                          | -2.333286000 | 0.000000000  | 0.000000000  |
| E+ZPE: -1383.430565 a. u.                                    |              |              | SbBr <sub>5</sub>                                           |              |              |              |
| Pb                                                           | 0.000000000  | 0.000000000  | E+ZPE: -13111.277496 a. u.                                  |              |              |              |
| I                                                            | 0.000000000  | 2.244679000  | Sb                                                          | 0.000000000  | 0.000000000  | 0.000000000  |
| I                                                            | -2.244679000 | 0.000000000  | Br                                                          | 0.000000000  | 0.000000000  | 2.536862000  |
| I                                                            | 0.000000000  | -2.244679000 | Br                                                          | 0.000000000  | 2.478409000  | 0.000000000  |
| I                                                            | 2.244679000  | 0.000000000  | Br                                                          | -2.146365000 | -1.239204000 | 0.000000000  |
| Transition state I for the decomposition of PbI <sub>4</sub> |              |              | Br                                                          | 0.000000000  | 0.000000000  | -2.536862000 |
| E+ZPE: -2766.841917 a. u.                                    |              |              | Br                                                          | 2.146365000  | -1.239204000 | 0.000000000  |
| Pb                                                           | 3.261365000  | 0.000023000  | Transition state for the decomposition of SbBr <sub>5</sub> |              |              |              |
| I                                                            | 0.738957000  | 0.000100000  | E+ZPE: -26222.519606 a. u.                                  |              |              |              |
| I                                                            | 4.911763000  | -2.234818000 | Sb                                                          | 3.293673000  | 0.106364000  | 0.000003000  |
| I                                                            | 2.168539000  | -0.000142000 | Sb                                                          | -3.293668000 | -0.106360000 | 0.000021000  |
| Pb                                                           | -3.261365000 | -0.000023000 | Br                                                          | 4.242224000  | -1.011385000 | -1.988146000 |
| I                                                            | -2.168539000 | 0.000142000  | Br                                                          | 4.242899000  | -1.011397000 | 1.987811000  |
| I                                                            | -0.738956000 | -0.000100000 | Br                                                          | 4.877171000  | 2.057782000  | -0.000228000 |
| I                                                            | -4.911764000 | 2.234818000  |                                                             |              |              |              |

Br 1.023696000 1.349016000 0.000212000  
 Br 1.450387000 -2.306843000 0.000374000  
 Br -1.023684000 -1.349000000 0.000296000  
 Br -4.877152000 -2.057791000 -0.000124000  
 Br -4.242140000 1.011223000 -1.988286000  
 Br -4.243022000 1.011551000 1.987701000  
 Br -1.450388000 2.306837000 0.000355000

SbCl<sub>5</sub>

E+ZPE: -2541.291618 a. u.

Sb 0.000000000 0.000000000 0.000000000  
 Cl 0.000000000 0.000000000 2.345696000  
 Cl 0.000000000 2.301105000 0.000000000  
 Cl 1.992815000 -1.150552000 0.000000000  
 Cl -1.992815000 -1.150552000 0.000000000  
 Cl 0.000000000 0.000000000 -2.345696000

Transition state for the decomposition of SbCl<sub>5</sub>

E+ZPE: -5082.492321 a. u.

Sb -3.112760000 -0.113737000 0.000309000  
 Sb 3.112803000 0.113809000 -0.000325000  
 Cl -1.193928000 2.209701000 0.000581000  
 Cl 0.912922000 1.293654000 0.000216000  
 Cl -0.912843000 -1.293816000 0.000154000  
 Cl 1.193855000 -2.209887000 0.000003000  
 Cl 3.944969000 -1.040754000 1.812787000  
 Cl 3.944028000 -1.040279000 -1.814160000  
 Cl 4.686916000 1.835701000 -0.000505000  
 Cl -3.944564000 1.040705000 -1.813063000  
 Cl -3.944584000 1.040407000 1.813865000  
 Cl -4.686901000 -1.835649000 0.000168000

PbBr<sub>4</sub>

E+ZPE: -10489.667323 a. u.

Pb 0.000000000 0.000000000 0.000000000  
 Br 0.000000000 2.073862000 1.466429000  
 Br 2.073862000 0.000000000 -1.466429000  
 Br 0.000000000 -2.073862000 1.466429000  
 Br -2.073862000 0.000000000 -1.466429000

Transition state for the decomposition of PbBr<sub>4</sub>

E+ZPE: -20979.282457 a. u.

Pb -3.017292000 -0.424315000 -0.000083000  
 Pb 3.017292000 0.424315000 0.000083000  
 Br -4.563290000 -0.045241000 2.044378000  
 Br -4.563600000 -0.044601000 -2.044188000  
 Br 4.563603000 0.044601000 2.044185000  
 Br 4.563286000 0.045241000 -2.044381000  
 Br 0.576848000 1.652639000 0.000346000  
 Br -1.892418000 2.305427000 0.000290000  
 Br -0.576848000 -1.652639000 -0.000344000  
 Br 1.892418000 -2.305427000 -0.000286000

PbCl<sub>4</sub>

E+ZPE: -2033.657506 a. u.

Pb 0.000000000 0.000000000 0.000000000  
 Cl 0.000000000 -1.943618000 1.373674000  
 Cl -1.943618000 0.000000000 -1.373674000  
 Cl 1.943618000 0.000000000 -1.373674000  
 Cl 0.000000000 1.943618000 1.373674000

Transition state for the decomposition of PbCl<sub>4</sub>

E+ZPE: -4067.228866 a. u.

Pb -2.814437000 0.309723000 -0.000134000  
 Pb 2.814437000 -0.309723000 0.000136000  
 Cl 0.524225000 -1.546221000 0.000593000  
 Cl -1.643838000 -2.239583000 0.000808000  
 Cl -4.264665000 -0.155611000 1.898832000

Cl -4.264799000 -0.157116000 -1.898628000  
 Cl -0.524227000 1.546219000 -0.000596000  
 Cl 1.643837000 2.239582000 -0.000816000  
 Cl 4.264799000 0.157124000 1.898628000  
 Cl 4.264667000 0.155606000 -1.898831000

Transition state for the decomposition of PbI<sub>4</sub> on reaction with PbI<sub>2</sub>.

E+ZPE: -2171.576294 a. u.

Pb -1.911150000 -0.202478000 -0.240439000  
 Pb 2.420821000 0.126971000 1.104636000  
 I -3.010737000 1.845783000 -1.759053000  
 I -3.992888000 -1.717525000 0.817007000  
 I -0.737450000 1.122995000 2.062479000  
 I 0.573581000 -1.448449000 -1.001673000  
 I 2.801926000 2.372960000 -0.543048000  
 I 3.577022000 -2.058942000 -0.912771000

Transition state for the decomposition of PbBr<sub>4</sub> on reaction with PbBr<sub>2</sub>.

E+ZPE: -15830.924724 a. u.

Pb -1.825572000 -0.251738000 -0.279445000  
 Pb 2.302506000 0.287222000 0.923314000  
 Br 0.539048000 -1.478136000 -0.921719000  
 Br -3.746183000 -1.377385000 1.052029000  
 Br -2.919514000 1.746537000 -1.502948000  
 Br 3.059985000 -2.113096000 -0.974255000  
 Br 2.414450000 2.096103000 -0.956614000  
 Br -0.465174000 1.042843000 1.795011000

Transition state for the decomposition of PbCl<sub>4</sub> on reaction with PbCl<sub>2</sub>.

E+ZPE: -3146.899527 a. u.

Pb -1.842343000 0.204382000 0.179826000  
 Cl -2.839610000 -1.722303000 1.277929000  
 Cl 0.279644000 1.605075000 0.767188000  
 Cl -3.569954000 0.883579000 -1.407446000  
 Cl -0.199186000 -1.035435000 -1.539260000  
 Pb 2.255175000 -0.308139000 -0.507972000  
 Cl 1.887396000 -1.582621000 1.564677000  
 Cl 2.450399000 2.352180000 0.919732000

PbI<sub>5</sub><sup>-</sup>

E+ZPE: -1681.205057 a. u.

Pb 0.000000000 0.000000000 0.000000000  
 I 0.000000000 0.000000000 2.932691000  
 I 0.000000000 2.844208000 0.000000000  
 I -2.463157000 -1.422104000 0.000000000  
 I 0.000000000 0.000000000 -2.932691000  
 I 2.463157000 -1.422104000 0.000000000

PbI<sub>6</sub><sup>2-</sup>

E+ZPE: -1978.873735 a. u.

Pb 0.000000000 0.000000000 0.000000000  
 I 0.000000000 0.000000000 2.984367000  
 I 0.000000000 2.984367000 0.000000000  
 I -2.984367000 0.000000000 0.000000000  
 I 0.000000000 0.000000000 -2.984367000  
 I 0.000000000 -2.984367000 0.000000000  
 I 2.984367000 0.000000000 0.000000000

PbF<sub>4</sub>

E+ZPE: -592.157805 a. u.

Pb 0.000033000 -0.000020000 -0.000005000  
 F -0.580708000 -1.595466000 -0.995064000  
 F -0.889788000 0.038291000 1.754891000  
 F 1.950569000 -0.059401000 0.254496000  
 F -0.480370000 1.616593000 -1.014274000

|                                |              |              |              |                               |              |              |              |
|--------------------------------|--------------|--------------|--------------|-------------------------------|--------------|--------------|--------------|
| PbH <sub>4</sub>               |              |              |              | I                             | 0.000000000  | -2.954216000 | 0.000000000  |
| E+ZPE: -195.020077 a. u.       |              |              |              | I                             | 0.000000000  | 0.000000000  | -2.954216000 |
| Pb                             | 0.000000000  | 0.000000000  | 0.000000000  | I                             | -2.954216000 | 0.000000000  | 0.000000000  |
| H                              | 1.010242000  | 1.010242000  | 1.010242000  | SbI <sub>5</sub> <sup>-</sup> |              |              |              |
| H                              | -1.010242000 | -1.010242000 | 1.010242000  | E+ZPE: -1728.643048 a. u.     |              |              |              |
| H                              | -1.010242000 | 1.010242000  | -1.010242000 | Sb                            | 0.329295000  | -0.000561000 | 0.000000000  |
| H                              | 1.010242000  | -1.010242000 | -1.010242000 | I                             | 0.534890000  | -3.047926000 | 0.000000000  |
| TeI <sub>6</sub> <sup>2-</sup> |              |              |              | I                             | 0.534490000  | 3.046659000  | 0.000000000  |
| E+ZPE: -2054.015425 a. u.      |              |              |              | I                             | 0.534890000  | 0.001065000  | 3.046810000  |
| Te                             | 0.000000000  | 0.000000000  | 0.000000000  | I                             | -2.456028000 | -0.000324000 | 0.000000000  |
| I                              | 0.000000000  | 0.000000000  | 2.954216000  | I                             | 0.534890000  | 0.001065000  | -3.046810000 |
| I                              | 0.000000000  | 2.954216000  | 0.000000000  |                               |              |              |              |
| I                              | 2.954216000  | 0.000000000  | 0.000000000  |                               |              |              |              |

Scheme S1: Distortion from tetrahedral geometry results in a second-order interaction between two antibonding orbitals and results in a low-lying antibonding MO.

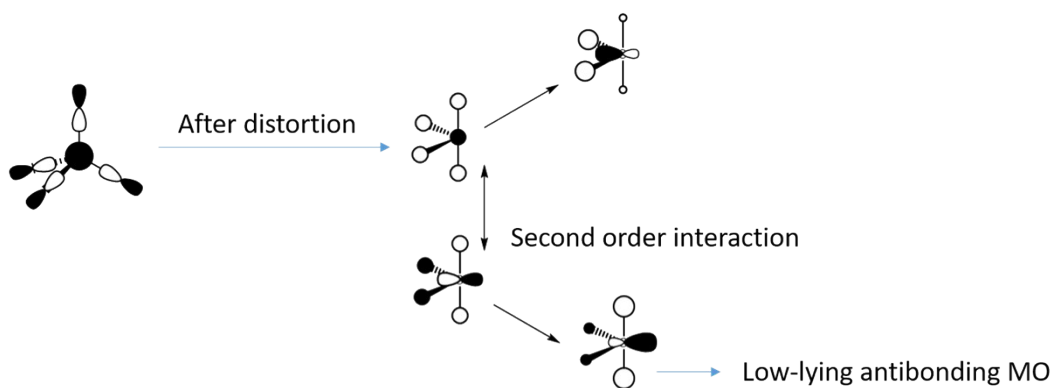

Supplement: d3cp00014a1.pdf [file d3cp00014a1.pdf]
